# Supplementary material for: Target-Site Mutation Genotyping of Insecticide-Resistant Female Anopheles Mosquitoes in Ota
Source: Research Square preprint supplement (doi:10.21203/rs.3.rs-8281061/v1), 2025-12-15
Supplement: Supplementary file 1 [file 9da0c889ec2d1ff36216584e.docx]

**Supplementary Table 1: Non-Significant Differences (Two-way ANOVA and Tukey's Multiple Comparisons Test) in Insecticide Susceptibility Across Five Breeding Sites**

| Comparison | Mean Diff. | 95% CI of Diff. | Summary | Adjusted P-Value |
| --- | --- | --- | --- | --- |
| NESTLE: Permethrin vs. CHELSEA: Permethrin | -0.50 | -4.091 to 3.091 | ns | >0.9999 |
| NESTLE: Permethrin vs. CANAAN CITY: Permethrin | 1.25 | -2.341 to 4.841 | ns | 0.9688 |
| NESTLE: Permethrin vs. ATAN: Permethrin | -1.25 | -4.841 to 2.341 | ns | 0.9688 |
| NESTLE: Permethrin vs. IJU: Permethrin | 0.00 | -3.591 to 3.591 | ns | >0.9999 |
| CHELSEA: Permethrin vs. CANAAN CITY: Permethrin | 1.75 | -1.841 to 5.341 | ns | 0.8069 |
| CHELSEA: Permethrin vs. ATAN: Permethrin | -0.75 | -4.341 to 2.841 | ns | 0.9992 |
| CHELSEA: Permethrin vs. IJU: Permethrin | 0.50 | -3.091 to 4.091 | ns | >0.9999 |
| CANAAN CITY: Permethrin vs. ATAN: Permethrin | -2.50 | -6.091 to 1.091 | ns | 0.3747 |
| CANAAN CITY: Permethrin vs. IJU: Permethrin | -1.25 | -4.841 to 2.341 | ns | 0.9688 |
| ATAN: Permethrin vs. IJU: Permethrin | 1.25 | -2.341 to 4.841 | ns | 0.9688 |

**Supplementary Table 2: Chi-square Test for Hardy-Weinberg Equilibrium in *Kdr*-W (L1014F)**

| Breeding Site | Allele R (p) | Allele S (q) | Expected RR | Expected RS | Expected SS |
| --- | --- | --- | --- | --- | --- |
| Nestle | 0.675 | 0.325 | 18.225 | 8.775 | 4.225 |
| Chelsea | 0.60 | 0.40 | 12.60 | 8.40 | 5.60 |
| Canaan City | 0.5625 | 0.4375 | 12.656 | 9.844 | 7.656 |
| Atan | 0.5571 | 0.4429 | 10.863 | 8.636 | 6.866 |
| Iju | 0.7125 | 0.2875 | 20.306 | 8.194 | 3.306 |

**Supplementary Table 3: Chi-square Test for Hardy-Weinberg Equilibrium in Kdr-E (L1014S)**

| Breeding Site | Allele R (p) | Allele S (q) | Expected RR | Expected RS | Expected SS |
| --- | --- | --- | --- | --- | --- |
| Nestle | 0.3875 | 0.6125 | 6.006 | 9.494 | 15.006 |
| Chelsea | 0.3571 | 0.6429 | 4.463 | 8.035 | 14.466 |
| Canaan City | 0.350 | 0.650 | 4.90 | 9.10 | 16.90 |
| Atan | 0.3857 | 0.6143 | 5.207 | 8.293 | 13.208 |
| Iju | 0.2625 | 0.7375 | 2.756 | 7.744 | 21.756 |

Supplementary Table 4: DNA Sequence for Mutation Detection

| Breeding sites | FASTA_Sequence |
| --- | --- |
| Atan 1 | >6_ATAN_1  GAACGGATTTTCAAGGCATTCCTTCATGATTGTGTTCCGTGTGCTATGCGGAGAATGGATTGAATCAATGTGGGATTGTATGCTTGTCGGTGATGTATCCTGCATACCATTTTTCTTGGCCACTGTAGTGATAGGAAATTTAGTCGTAAGTAATGCAAATTAACATGGACCAAGATCGTTTTTACATGACATTGTTTTGCAGGTGCTTAACCTTTTCTTAGCCTTGCTTTTGTCAAATTTTGGTTCATCATCCTTGC |
| Atan 2 | >8_ATAN_2  CATAGATTTCATGGCATTCCTTCATGATTGTGTTCCGTGTGCTATGCGGAGAATGGATTGAATCAATATGGGATTGTATGCTTGTCGGTGATGTATCCTGCATACCATTTTTCTTGGCCACTGTAGTGATAGGAAATTTTGTCGTAAGTAATGCAAATTAACATGGACCAAGATCGTTTTTACATGACATTGTTTTGCAGGTGCTTAACCTTTTCTTAGCCTTGCTTTTGTCAAATTTTGGTTCATCATCCTTGTC |
| Atan 3 | >22_ATAN_3  GCCCCTAAGAAAGGATAGCACCTGCAAACAATGTCATGTAAAAACGATCTTGGTCCATGTTAATTTGATTACTTACGACAAAATTTCCTATCACTACAGTGGCCAAGAAAAATGGTATGCAGGATACATCACCGACAAGCATACAATCCCACATTGATTCAATCCATTCTCCGCATAGCACACGGAACACAATCATGAAGGAATGCATGAAATCTGTAAAATTCCATCTTGGCAGATCATGGTCGGGGAATCATA |
| Atan 4 | >23_ATAN_4  GCTCTCGAAAAGAAAGCACCTGCAAACAATGTCATGTAAAAACGATCTTGGTCCATGTTAATTTGCATTACTTACGACAAAATTTCCTATCACTACGTGGCAAGAAAAATGGTATGCAGGATACATCACCGACAAGCATACAATCCCACATTGATTCAATCCATTCTCCGATAGACACGGAACACAATCATGAAGGAATGCATGAAATCTGTAAAATTCCATCTTGGAGATCATGGTCGGGGAATCTAT |
| Atan 5 | >15_ATAN_5  CACTAAGAATTTCATGGCATTCCTTCATGATTGTGTTCCGTGTGCTATGCGGAGAATGGATTGAATCAATGTGGGATTGTATGCTTGTCGGTGATGTATCCTGCATACCATTTTTCTTGGCCACTGTAGTGATAGGAAATTTAGTCGTAAGTAATGCAAATTAACATGGACCAAGATCGTTTTTACATGACATTGTTTTGCAGGTGCTTAACCTTTTCTTAGCCTTGCTTTTGTCAAATTTTGGTTCATCATCCTTGTC |
| Atan 6 | >16_ATAN_6  CATCGAATTTCATGCATTCCTTCATGATTGTGTTCCGTGTGCATGCGGAGAATGGATTGAATCAATATGGGATTGTATGCTTGTCGGTGATGTATCCTGCATACCATTTTTCTTGGCCACTGTAGTGTAGGAAATTTTGTCGTAAGTAATGCAAATTAACATGGACCAAGATCGTTTTTACATGACATTGTTTTGCAGGTGCTTAACCTTTTCTTAGCCTTGCTTTTGTCAAATTTTGGTTCATCATCCTTGTC |
| Atan A | >21_ATAN_A  ACTACGAATTTCATGCATTCCTTCATGATTGTGTTCCGTGTGTATGCGGAGAATGGATTGAATCAATGTGGGATTGTATGCTTGCGGTGATGTATCCTGCATACCATTTTTCTTGGCCACTGTAGTGATAGGAAATTTTGTCGTAAGTAATGCAAATTAACATGGACCAAGATCGTTTTTACATGACATTGTTTTGCAGGTGCTTAACCTTTTCTTAGCCTTGCTTTTGTCAAATTTTGGTTCATCATCCTTGTCTA |
| Atan B | >21_ATAN_B  ACCCTAAGGTAAGATAAGCACCTGCAAACAATGTCATGTAAAACGATCTTGGTCCATGTTAATTTGCATTACTTACGACAAAATTTCCTATCACTACAGTGGCCAAGAAAAATGGTATGCAGGATACATCACCGACAAGCATACAATCCCACATTGATTCAATCCATTCTCCGCATAGCACACGGAACACAATCATGAAGGAATGCATGAAATCTGTAAAATTCCATCTTGGCAGATCATGGTCGGGGAATCATA |
| Canaan city 1 | >4_CANAAN_CITY_1  AATCCTCCTGTGATATCCTATCATGATAGCGTGTCCGTGTGCTATGCGGAAAATGGATTGAATCAATGTGGGATTGTATGCTTGGCGGTGATGTATCCTGCATACCATTTTTCTTGGCCACTGTAGTGATAGGAAATTTTGTCGTAAGTAATGCAAATTAACATGGACCAAGATCGTTTTTACATGACATTGTTTTGCAGGTGCTTAACCTTTTCTTAGCCTTGCTTTTGTCAAATTTTGGTTCATCATCCTTGTCTCGTGG |
| Canaan city 2 | >5_CANAAN_CITY_2  ACATCTTCATGCCATTCCTTCATGATTGTGTTCCGTGTGCTATGCGGAGAATGGATTGAATCAATGTGGGATTGTATGCTTGTCGGTGATGTATCCTGCATACCATTTTTCTTGGCCACTGTAGTGATAGGAAATTTTGTCGTAAGTAATGCAAATTAACATGGACCAAGATCGTTTTTACATGACATTGTTTTGCAGGTGCTTAACCTTTTCTTAGCCTTGCTTTTGTCAAATTTTGGTTCATCATCCTTGTCT |
| Canaan City 3 | >19_CANAAN_CITY_3  GATTTGCAAGGAATGGATGAGCACTGTGTCGGGCGATGTCTTGTAAAAACGATCTTGGTCCATGTTAATTTGCATTACTTACGACAAAATTTCCTATCACTACAGTGGCCAAGAAAAATGGTATGCAGGATACATCACCGACAAGCATACAATCCCACATTGATTCAATCCATTCTCCGCATAGCACACGGAACACAATCATGAAGGAATGCATGAAATCTGTAAAATTCCATCTTGGCAGATCATGGTCGGGGAATCTATAAGACAA |
| Canaan City 4 | >20_CANAAN_CITY_4  GCCCCTGGGAAGGGATAAGCACCTGCAAAACAATGTCATGTAAAAACGATCTTGGTCCATGTTAATTTGCATTACTTACGACAAAATTTCCTATCACTACAGTGGCCAAGAAAAATGGTATGCAGGATACATCACCGACAAGCATACAATCCCACATTGATTCAATCCATTCTCCGCATAGCACACGGAACACAATCATGAAGGAATGCATGAAATCTGTAAAATTCCATCTTGGCAGATCATGGTCGGGGAATCTA |
| Canaan City 5 | >29_CANAAN_CITY_5  GAAATGGAACGGTTATCTAGACGACGATGATGGATCCATTGTGACAAGGGAAATCCGTATCCATGATAATTTGAATTACTTACGACAAAATTTCCTATCACTACAGTGGCCAAGAAAAATGGTATGCAGGATACATCACCGACAAGCATACAATCCCACATTGATTCAATCCATTCTCCGCATAGCACACGGAACACAATCATGAAGGAATGCATGAAATCTGTAAAATTCCATCTTGGCAGATCATGGTCGGGGAATCTATACATGTGCGCGGAGAATATACACAGGGATGATAAACCGTGGG |
| Canaan City A | >13_CANAAN_CITY_A  CATCACATTTCATGCATTCCTTCATGATTGTGTTCCGTGTGCATGCGGAGAATGGATTGAATCAATGTGGGATTGTATGCTTGTCGGTGATGTATCCTGCATACCATTTTTCTTGGCCACTGTAGTGATAGGAAATTTTGTCGTAAGTAATGCAAATTAACATGGACCAAGATCGTTTTTACATGACATTGTTTTGCAGGTGCTTAACCTTTTCTTAGCCTTGCTTTTGTCAAATTTTGGTTCATCATCCTTGTC |
| Canaan City B | >13_CANAAN_CITY_B  GCCTTCGGAAGGATAAGCACCTGCAAACAATGTCATGTAAAAACGATCTTGGTCCATGTTAATTTGCATTACTTACGACAAAATTTCCTATCACTACAGTGGCCAAGAAAAATGGTATGCAGGATACATCACCGACAAGCATACAATCCCACATTGATTCAATCCATTCTCCGCATAGCACACGGAACACAATCATGAAGGAATGCATGAAATCTGTAAAATTCCATCTTGGCAGATCATGGTCGGGGAATCTATA |
| Chelsea 1 | >9_CHELSEA_1  CAAAGGAATTTCATGCCATTCCTTCATGATTGTGTTCCGTGTGCTATGCGGAGAATGGATTGAATCAATATGGGATTGTATGCTTGTCGGTGATGTATCCTGCATACCATTTTTCTTGGCCACTGTAGTGATAGGAAATTTTGTCGTAAGTAATGCAAATTAACATGGACCAAGATCGTTTTTACATGACATTGTTTTGCAGGTGCTTAACCTTTTCTTAGCCTTGCTTTTGTCAAATTTTGGTTCATCATCCTTGTCT |
| Chelsea 2 | >10_CHELSEA_2  CATCAAAATTTCAAGCATTCCTTCATGATTGTGTTCCGTGTGCTATGCGGAGAATGGATTGAATCAATGTGGGATTGTATGCTTGTCGGTGATGTATCCTGCATACCATTTTTCTTGGCCACTGTAGTGATAGGAAATTTTGTCGTAAGTAATGCAAATTAACATGGACCAAGATCGTTTTTACATGACATTGTTTTGCAGGTGCTTAACCTTTTCTTAGCCTTGCTTTTGTCAAATTTTGGTTCATCATCCTTGTC |
| Chelsea 3 | >24_CHELSEA_3  GCTTTGGGAAAGGTTAAGCACCTGCAAAACAATGTCATGTAAAAACGATCTTGGTCCATGTTAATTTGCATTACTTACGACAAAATTTCCTATCACTACAGTGGCCAAGAAAAATGGTATGCAGGATACATCACCGACAAGCATACAATCCCACATTGATTCAATCCATTCTCCGCATAGCACACGGAACACAATCATGAAGGAATGCATGAAATCTGTAAAATTCCATCTTGGCAGATCATGGTCGGGGAATCTATA |
| Chelsea 4 | >25_CHELSEA_4  ACCTTCGGAAGGATAAGCACCTGCAAAACAATGTCATGTAAAAACGATCTTGGTCCATGTTAATTTGCATTACTTACGACAAAATTTCCTATCACTACAGTGGCCAAGAAAAATGGTATGCAGGATACATCACCGACAAGCATACAATCCCACATTGATTCAATCCATTCTCCGCTAGACCGGAACACATCTGAAGGAATGCATGAAATCTGTAAAATTCCATCTTGGAGATCATGGTCGGGGAATCTAT |
| Chelsea 5 | >30_CHELSEA_5  GCTTCCAGGGAAAAGGTTAGCCACCTGACAAACAATGTCATGTAAAAACGATCTTGGATCCATGTTAATTTGCATTACTTACGACTAAATTTCCTATCACTACAGTGGCCAAGAAAAATGGTATGCAGGATACATCACCGACAAGCATACAATCCCACATTGATTCAATCCATTCTCCGCATAGCACACGGAACACAATCATGAAGGAATGCATGAAATCTGTAAAATTCCATCTTGGCAGATCATGGTCGGGGAATCTATACACATGGACGGG |
| Chelsea A | >27_CHELSEA_A  AATAAGAAGTTTCATGCCATTCCTTCATGATTGTGTTGCGGTGTGCTATGTGGTAGAATGGATTGAATCAATGTGGGATTGTATGCTTGTCGGTGATGTATCCTGCATACCATTTTTCTTGGCCACTGTAGTGATAGGAAATTTAGTCGTAAGTAATGCAAATTAACATGGACCAAGATCGTTTTTACATGACATTGTTTTGCAGGTGCTTAACCTTTTCTTAGCCTTGCTTTTGTCAAATTTTGGTTCATCATCCTTGTCTA |
| Chelsea B | >27_CHELSEA_B  ATCTTTAGAAAGGGTAGCACCTGCAAACAATGTCATGTAAAAACGATCTTGGTCCATGTTAATTTGAATTACTTACGACAAAATTTCCTATCACTACAGTGGCCAGAAAAATGGTATGCAGGATACATCACCGACAAGCATACAATCCCACATTGATTCAATCCATTCTCCGATAGCACACGGAACACAATCATGAAGGAATGCATGAAATCTGTAAAATTCCATCTTGGCAGATCATGGTCGGGGAATCTAT |
| Iju 1 | >2_IJU_1  ATTAACGAAATTTCATGGCATTCCTTCATGATTGTGTTCCGTGTGCTATGCGGAGAATGGATTGAATCAATGTGGGATTGTATGCTTGTCGGTGATGTATCCTGCATACCATTTTTCTTGGCCACTGTAGTGATAGGAAATTTTGTCGTAAGTAATGCAAATTAACATGGACCAAGATCGTTTTTACATGACATTGTTTTGCAGGTGCTTAACCTTTTCTTAGCCTTGCTTTTGTCAAATTTTGGTTCATCATCCTTGTC |
| Iju 2 | >3_IJU_2  AAAACCGCCTGGCATCTAAGATTATGCTTGCGTGTCCTCGTTGCTCTGCGGAAAATGGATTGAATCAATGTGGGATTGTATGCTTGTCGGTGATGTATCCTGCATACCATTTTTCTTGGCCACTGTAGTGATAGGAAATTTTGTCGTAAGTAATGCAAATTAACATGGACCAAGATCGTTTTTACATGACATTGTTTTGCAGGTGCTTAACCTTTTCTTAGCCTTGCTTTTGTCAAATTTTGGTTCATCATCCTTGTCTCAAG |
| Iju 3 | >17_IJU_3  GCATTAAAAAAGAATGATGAGCCACTGTGTCAGACAATTCTCTTGTAAAAACGATCTTGGTCCATGTTAATTTGCATTACTTACGACAAAATTTCCTATCACTACAGTGGCCAAGAAAAATGGTATGCAGGATACATCACCGACAAGCATACAATCCCACATTGATTCAATCCATTCTCCGCATAGCACACGGAACACAATCATGAAGGAATGCATGAAATCTGTAAAATTCCATCTTGGCAGATCATGGTCGGGGAATCTATA |
| Iju 4 | >18_IJU_4  AGCCTAGGAAAGGTTAAGCACCTGCAAAACAATGTCATGTAAAAACGATCTTGGTCCATGTTAATTTGAATTACTTACGACAAAATTTCCTATCACTACAGTGGCCAAGAAAAATGGTATGCAGGATACATCACCGACAAGCATACAATCCCACATTGATTCAATCCATTCTCCGCATAGCACACGGAACACAATCATGAAGGAATGCATGAAATCTGTAAAATTCCATCTTGGCAGATCATGGTCGGGGAATCTATATAC |
| Iju 5 | >14_IJU_5  AGAAGTGTATCATTGCCATGCCTCTCATGATTGTGTTCCGTGTGCTATGCGGAGAATGGATTGAATCAATGTGGGATTGTATGCTTGTCGGTGATGTATCCTGCATACCATTTTTCTTGGCCACGGTAGTGATAGGAAATTTTGTCGTAAGTAATGCAAATTAACATGGACCAAGATCGTTTTTACATGACATTGTTTTGCAGGTGCTTAACCTTTTCTTAGCCTTGCTTTTGTCAAATTTTGGTTCATCATCCTTGTCTA |
| Iju A | >7_IJU_A  TATCGCATTTCATGGCATTCCTTCATGATTGTGTTCCGTGTGCTATGCGGAGAATGGATTGAATCAATGTGGGATTGTATGCTTGTCGGTGATGTATCCTGCATACCATTTTTCTTGGCCACTGTAGTGATAGGAAATTTTGTCGTAAGTAATGCAAATTAACATGGACCAAGATCGTTTTTACATGACATTGTTTTGCAGGTGCTTAACCTTTTCTTAGCCTTGCTTTTGTCAAATTTTGGTTCATCATCCTTGTC |
| Iju B | >7_IJU_B  ACTAATCGAAACGATAAGCACCTGCAAACAATGTCATGTAAAAACGATCTTGGTCCATGTTAATTTGAATTACTTACGACAAAATTTCCTATCACTACAGTGGCCAAGAAAAATGGTATGCAGGATACATCACCGACAAGCATACAATCCCACATTGATTCAATCCATTCTCCGCATAGCACACGGAACACAATCATGAAGGAATGCATGAAATCTGTAAAATTCCATCTTGGCAGATCATGGTCGGGGAATCTATA |
| Nestle 1 | >11_NESTLE_1  AATTCGTATTTCTGGCATTCCTTCATGATTGTGTTCCGTGTGCTATGCGGAGAATGGATTGAATCAATATGGGATTGTATGCTTGTCGGTGATGTATCCTGCATACCATTTTTCTTGGCCACTGTAGTGATAGGAAATTTTGTCGTAAGTAATGCAAATTAACATGGACCAAGATCGTTTTTACATGACATTGTTTTGCAGGTGCTTAACCTTTTCTTAGCCTTGCTTTTGTCAAATTTTGGTTCATCATCCTTGTCT |
| Nestle 2 | >12_NESTLE_2  GAAAATCTTCGATAGCCAATTCCTTCATGATTGTGTTCCGTGTGCTATGCGGAGAATGGATTGAATCAATGTGGGATTGTATGCTTGTCGGTGATGTATCCTGCATACCATTTTTCTTGGCCACTGTAGTGATAGGAAATTTTGTCGTAAGTAATGCAAATTAACATGGACCAAGATCGTTTTTACATGACATTGTTTTGCAGGTGCTTAACCTTTTCTTAGCCTTGCTTTTGTCAAATTTTGGTTCATCATCCTTGTCT |
| Nestle 3 | >26_NESTLE_3  GATTAAAAGAATGATGAGCACCGTGTCAGGGGAATCTCTTGTAAAAACGATCTTGGTCCATGTTAATTTGCATTACTTACGACAAAATTTCCTATCACTACAGTGGCCAAGAAAAATGGTATGCAGGATACATCACCGACAAGCATACAATCCCACATTGATTCAATCCATTCTCCGCATAGCACACGGAACACAATCATGAAGGAATGCATGAAATCTGTAAAATTCCATCTTGGCAGATCATGGTCGGGGAATCTAT |
| Nestle 4 | >28_NESTLE_4  GGTTTGGAACGGGGTATCTAGACAGGATGATGAACCATGGTCGGGGAAATCTGTACACGTGACAATTAGCATTACTTACGACAAAATTTCCTATCACTACAGTGGCCAAGAAAAATGGTATGCAGGATACATCACCGACAAGCATACAATCCCACATTGATTCAATCCATTCTCCGCATAGCACACGGAACACAATCATGAAGGAATGCATGAAATCTGTAAAATTCCATCTTGGCAGATCATGGTCGGGGAATCTATACATG |
| Nestle 5 | >31_NESTLE_5  GCCAGTTAGTAAAGGTTAAGCACCTGCAAACAATGTCATGTAAAAACGATCTTGGTCCATGTTAATTTGCATTACTTACGACAAAATTTCCTATCACTACAGTGGCCAAGAAAAATGGTATGCAGGATACATCACCGACAAGCATACAATCCCACATTGATTCAATCCATTCTCCGCATAGCACACGGAACACAATCATGAAGGAATGCATGAAATCTGTAAAATTCCATCTTGGCAGATCATGGTCGGGGAATCTATA |
| Nestle A | >32_NESTLE_A  CCTTCAGAAAATTCATGCAATTCCTTCTGATTGTGTTCCGTGTGCTATGCGGAGAATGGATTGAATCAATGTGGGATTGTATGCTTGTCGGTGATGTATCCTGCATACCATTTTTCTTGGCCACTGTAGTGATAGGAAATTTTGTCGTAAGTAATGCAAATTAACATGGACCAAGATCGTTTTTACATGACATTGTTTTGCAGGTGCTTAACCTTTTCTTAGCCTTGCTTTTGTCAAATTTTGGTTCATCATCCTTGTCTA |
| Nestle B | >32_NESTLE_B  GGCCTAAGAAAGGATAGCACCTGCAAAACAATGTCATGTAAAAACGATCTTGGTCCATGTTAATTTGAATTACTTACGACAAAATTTCCTATCACTACAGTGGCCAAGAAAAATGGTATGCAGGATACATCACCGACAAGCATACAATCCCACATTGATTCAATCCATTCTCCGCATAGCACACGGAACACAATCATGAAGGAATGCATGAAATCTGTAAAATTCCATCTTGGCAGATCATGGTCGGGGAATCTATA |
